# Supplementary material for: New insights into the role of dislocation engineering in N-type filled skutterudite CoSb3
Source: Royal Society of Chemistry journal article supplement (doi:10.1039/c9tc03839f), 2019-01-01
Supplement: c9tc03839f1.pdf [file c9tc03839f1.pdf]

## Supporting Information

### **New Insights into the Role of Dislocation Engineering in N-type Filled Skutterudite CoSb<sub>3</sub>**

Zihang Liu<sup>1,†</sup>, Xianfu Meng<sup>1,2,†</sup>, Dandan Qin<sup>1</sup>, Bo Cui<sup>1</sup>, Haijun Wu<sup>3</sup>, Yang Zhang<sup>3</sup>, Stephen J. Pennycook<sup>3</sup>, Wei Cai<sup>1</sup> and Jiehe Sui<sup>1\*</sup>

<sup>1</sup> State Key Laboratory of Advanced Welding and Joining, Harbin Institute of Technology, Harbin 150001, China

<sup>2</sup> Institute of Nuclear Physics and Chemistry, China Academy of Engineering Physics, Mianyang 621900, China

<sup>3</sup> Department of Materials Science and Engineering, National University of Singapore 117575, Singapore

\* To whom correspondence should be addressed. E-mail: [suijiehe@hit.edu.cn](mailto:suijiehe@hit.edu.cn)

<sup>†</sup> Equal contributors

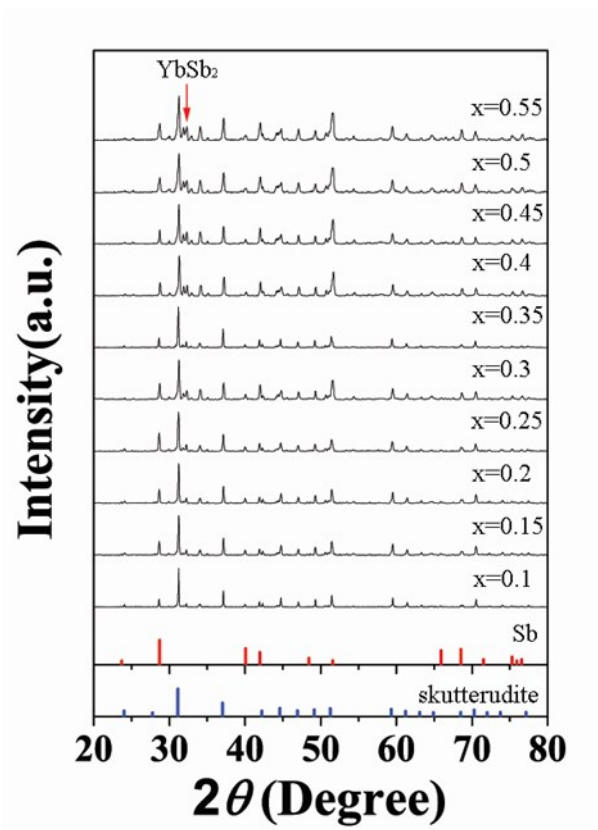

**Figure S1 XRD patterns of  $\text{Yb}_x\text{Co}_4\text{Sb}_{14.4}$  ribbons ( $x = 0.1, 0.15, 0.2, 0.25, 0.3, 0.35, 0.4, 0.45, 0.5, \text{ and } 0.55$ )**

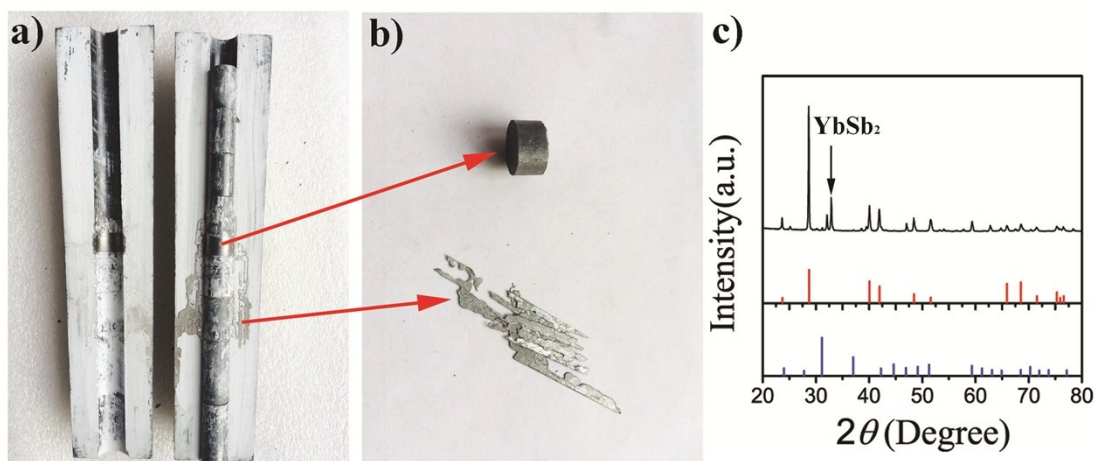

**Figure S2 Images of compacted sample and expelled substance and XRD patterns of expelled substance. a) and b) Images of compacted sample and expelled substance, respectively. c) XRD patterns**

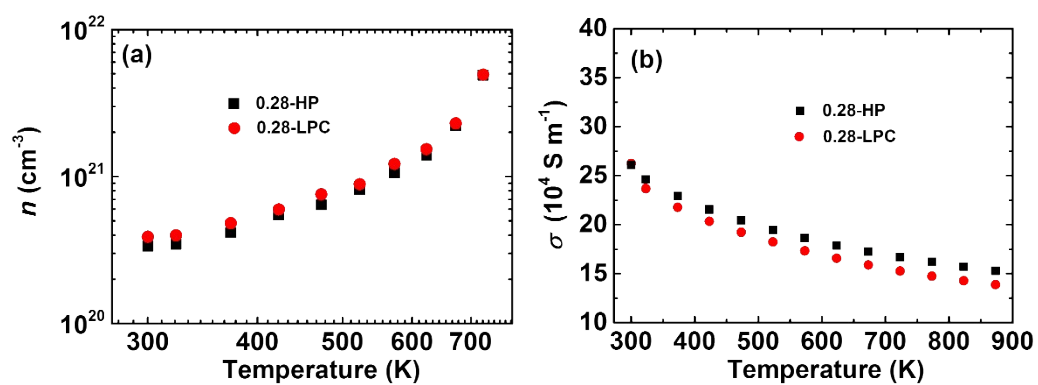

**Figure S3 Temperature dependent (a) carrier concentration and (b) electrical conductivity for 0.28-HP and 0.28-LPC samples**

Calculation of Debye temperature and Grüneisen parameter:

Both Debye temperature  $\theta_D$  and Grüneisen parameter  $\gamma$  can be calculated by the following equations based on the measured the longitudinal ( $v_l$ ) and transverse ( $v_s$ ) sound speed <sup>[1]</sup>:

$$v_a = \left( \frac{1}{3} \left[ \frac{1}{v_l^3} + \frac{2}{v_s^3} \right] \right)^{-1/3} \quad (11)$$

$$\theta_D = \frac{h}{k_B} \left[ \frac{3N}{4\pi V} \right]^{1/3} v_a \quad (12)$$

$$\varepsilon = \frac{2}{9} \left( \frac{6.4 \times \gamma (1 + \nu_p)}{(1 - \nu_p)} \right)^2 \quad (13)$$

$$\nu_p = \frac{1 - 2(v_s/v_l)^2}{2 - 2(v_s/v_l)^2} \quad (14)$$

$$\gamma = \frac{3}{2} \left( \frac{1 + \nu_p}{2 - 3\nu_p} \right) \quad (15)$$

where  $v_a$  is the average sound velocity,  $V$  the unit-cell volume,  $N$  the number of atoms in a unit cell,  $k_B$  the Boltzmann parameter,  $h$  the Planck constant,  $\varepsilon$  phenomenological adjustable parameter and  $\nu_p$  the Poisson ratio.

[1] Y.-L. Pei, J. Q. He, J.-F. Li, F. Li, Q. J. Liu, W. Pan, C. Barreateau, D. Berardan, N. Dragoe, L.-D. Zhao, NPG Asia Mater. 2013, 5, e47.
